# Supplementary material for: Possible Role of CHAD Proteins in Copper Resistance
Source: MDPI journal article supplement (doi:10.3390/microorganisms12020409), 2024-02-18
Supplement: s1 [file s1]

## SUPPLEMENTARY MATERIAL

**Table S1.** Primers employed and their uses.

| Primer      | Sequence                                                                            | Use                                                                  |
|-------------|-------------------------------------------------------------------------------------|----------------------------------------------------------------------|
| ygiF H1P1   | AAGTTTATTGTTAATCACAGTGCC<br>GTTGAGGCGTTG CGTG<br>ACCATCTCAATGTAGGCTGGAGC<br>TGCTTCG | To generate <i>ygiF</i> ::cm mutant strain                           |
| ygiF H2P1   | AGAACGGTTCCTGATTGTTTGCCTCA<br>TTACGGAAATGTTC<br>AATTTCGATGATGGGAATTAGCCATG<br>GTCC  | To generate <i>ygiF</i> ::cm mutant strain                           |
| ygiF fwe    | CCATGGCTCAGGAAATCGAATTAAAG                                                          | Analyze gene <i>ygiF</i> mutation<br>Cloning entire <i>ygiF</i> gene |
| ygiF rve    | AAGCTTACGTTTTCCGCTGTGC                                                              | Analyze gene <i>ygiF</i> mutation<br>Cloning entire <i>ygiF</i> gene |
| ygiF_CH fw  | CCATGGGTAAAGCCGATGTGGAACAG                                                          | Cloning YgiF CHAD domain                                             |
| ygiF_CH rv  | AAGCTTTTAACGTTTTCCGCTGTGCA                                                          | Cloning YgiF CHAD domain                                             |
| ygiF_CY fw  | CCATGGCTCAGGAAATCGAATT                                                              | Cloning YgiF CYTH domain                                             |
| ygiF_CY rv  | AAGCTTTTAATTGCCCTGCGCCAGAT                                                          | Cloning YgiF CYTH domain                                             |
| 1874_fwNc   | CCATGGAACAGGAGCTTAAACTG                                                             | Cloning complete gene<br><i>afe_1874</i>                             |
| 1874_rvHd   | AAGCTTGTTCCACGGACGGGGG                                                              | Cloning complete gene<br><i>afe_1874</i>                             |
| ygFH345Arv  | GGCATGGCGGGAAAGAGCGATATCTGCAA<br>AGCGTTTGAAGG                                       | Generation of <i>ygiF</i> *H345A mutant strain                       |
| ygFH345Afd  | ACGCTTTGCAGATATCGCTCTTTCCCGCCA<br>TGCC                                              | Generation of <i>ygiF</i> *H345A mutant strain                       |
| ygFH349Arv  | CTTTTCAGTTCAGCAGCAGCGCGGGAAAG<br>ATGGATATCGGC                                       | Generation of <i>ygiF</i> *H349A mutant strain                       |
| ygFH349Afd  | GCCGATATCCATCTTTCCCGCGCTGCTGCT<br>GAACTGAAAAGC                                      | Generation of <i>ygiF</i> *H349A mutant strain                       |
| ygiF*H349rv | GCTTTTCAGTTCAGCAGCAGCGCGGGAAA<br>GAGCGATATCTGC                                      | Generation of<br><i>ygiF</i> *H345,349A double mutant                |
| ygiF*H349fd | GCAGATATCGCTCTTTCCCGCGCTGCTGCT<br>GAACTGAAAAGC                                      | Generation of<br><i>ygiF</i> *H345,349A double mutant                |

Primers were designed by using SnapGene program version 5.3.1. Thermodynamic properties of primers, such as formation of hairpins, primer dimers and auto aligning sites were analyzed by using “OligoAnalyzer” version 3.1 ([www.idtdna.com/analyzer/applications/oligoanalyzer/](http://www.idtdna.com/analyzer/applications/oligoanalyzer/)).

**Table S2.** Details of the PCR program used to generate *E. coli* mutant *ygiF::cm*; complemented strains YgiF, CHAD, CYTH and Afe; and YgiF variant strains . PCR reactions included 1) denaturation, aligning and 3) extension.

|                      | Step | Cycles number | Temperature (°C) | Duration (min) |
|----------------------|------|---------------|------------------|----------------|
| PCR 1 <sup>a</sup>   | 1    | 1             | 94               | 2:00           |
|                      | 2    | 35            | 94               | 0:15           |
|                      |      |               | 50               | 0:15           |
|                      |      |               | 68               | 1:30           |
|                      | 3    | 1             | 68               | 5:00           |
| PCR 1.2 <sup>b</sup> | 1    | 1             | 94               | 5:00           |
|                      | 2    | 35            | 94               | 0:20           |
|                      |      |               | 50               | 0:20           |
|                      |      |               | 72               | 1:30           |
|                      | 3    | 1             | 72               | 5:00           |
| PCR 2 <sup>c</sup>   | 1    | 1             | 95               | 2:00           |
|                      | 2    | 35            | 95               | 0:20           |
|                      |      |               | 50               | 0:20           |
|                      |      |               | 72               | 1:30           |
|                      | 3    | 1             | 72               | 5:00           |
| PCR 1 <sup>d</sup>   | 1    | 1             | 95               | 2:00           |
|                      | 2    | 35            | 95               | 0:20           |
|                      |      |               | 56               | 0:20           |
|                      |      |               | 72               | 1:30           |
|                      | 3    | 1             | 72               | 5:00           |
| PCR 2 <sup>e</sup>   | 1    | 1             | 95               | 2:00           |
|                      | 2    | 10            | 95               | 0:20           |
|                      |      |               | 62               | 0:20           |
|                      |      |               | 72               | 1:30           |
|                      | 3    | 1             | 72               | 5:00           |

|                      |   |    |    |      |
|----------------------|---|----|----|------|
| PCR 1.2 <sup>f</sup> | 1 | 1  | 95 | 2:00 |
|                      | 2 | 35 | 95 | 0:20 |
|                      |   |    | 57 | 0:20 |
|                      |   |    | 72 | 1:30 |
|                      | 3 | 1  | 72 | 5:00 |

<sup>a</sup> PCR 1: amplification of Wanner fragment comprising a chloramphenicol resistance cassette flanked by homology to gene *ygiF*.

<sup>b</sup> PCR 1.2: confirmation of mutation in *ygiF* gene.

<sup>c</sup> PCR 2: amplification of domain CHAD (YgiF), CYTH (YgiF) and genes *Afe* and *ygiF*.

<sup>d</sup> Amplification of fragments 1 and 2 of variant strains *ygiF*\*H345A, *ygiF*\*H349A and *ygiF*\*H345,349A

<sup>e</sup> Overlap PCR: fusion of fragments 1 and 2 of *ygiF* mutant gene.

<sup>f</sup> Overlap PCR: amplification of the final mutant fragment.



A

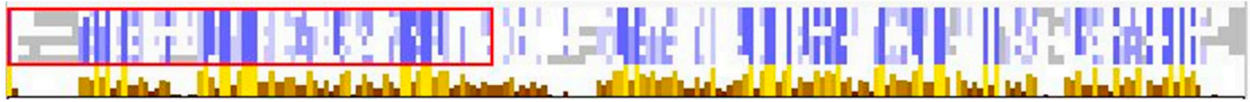

B

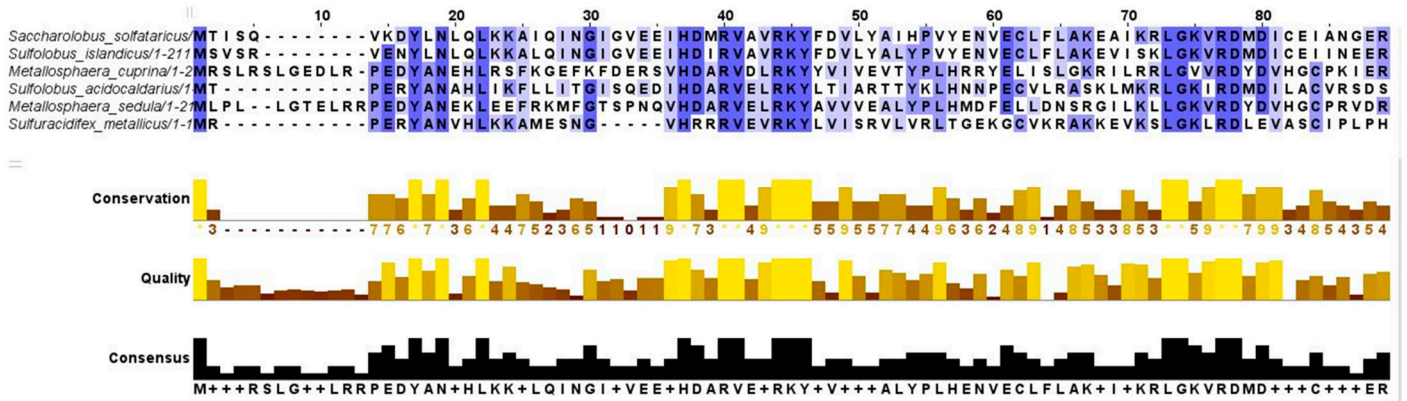

**Figure S2. Alignment of CHAD protein sequences from some archaea.** *Sa. solfataricus* (taxid: 2287), *S. islandicus* (taxid: 43080), *M. cuprina* (taxid: 1006005), *S. acidocaldarius* (taxid: 2285), *M. sedula* (taxid: 43687) and *S. metallicus* (taxid: 47303) are analyzed. **A.** General view of the chosen sequence alignments containing CHAD proteins. The red rectangle indicates the expanded CHAD proteins as shown in **B.** For the alignment, the software Multiple Sequence Alignment Clustal Omega was applied. Alignment results are visualized with Jalview software. For a better comparison, an approximation to the carboxyl terminal is shown. This highlights the conserved CHAD domain. The blue intensity correlates with the degree of conservation. Conservation and quality (yellow and brown bars), and consensus sequences (black bars) are also shown.

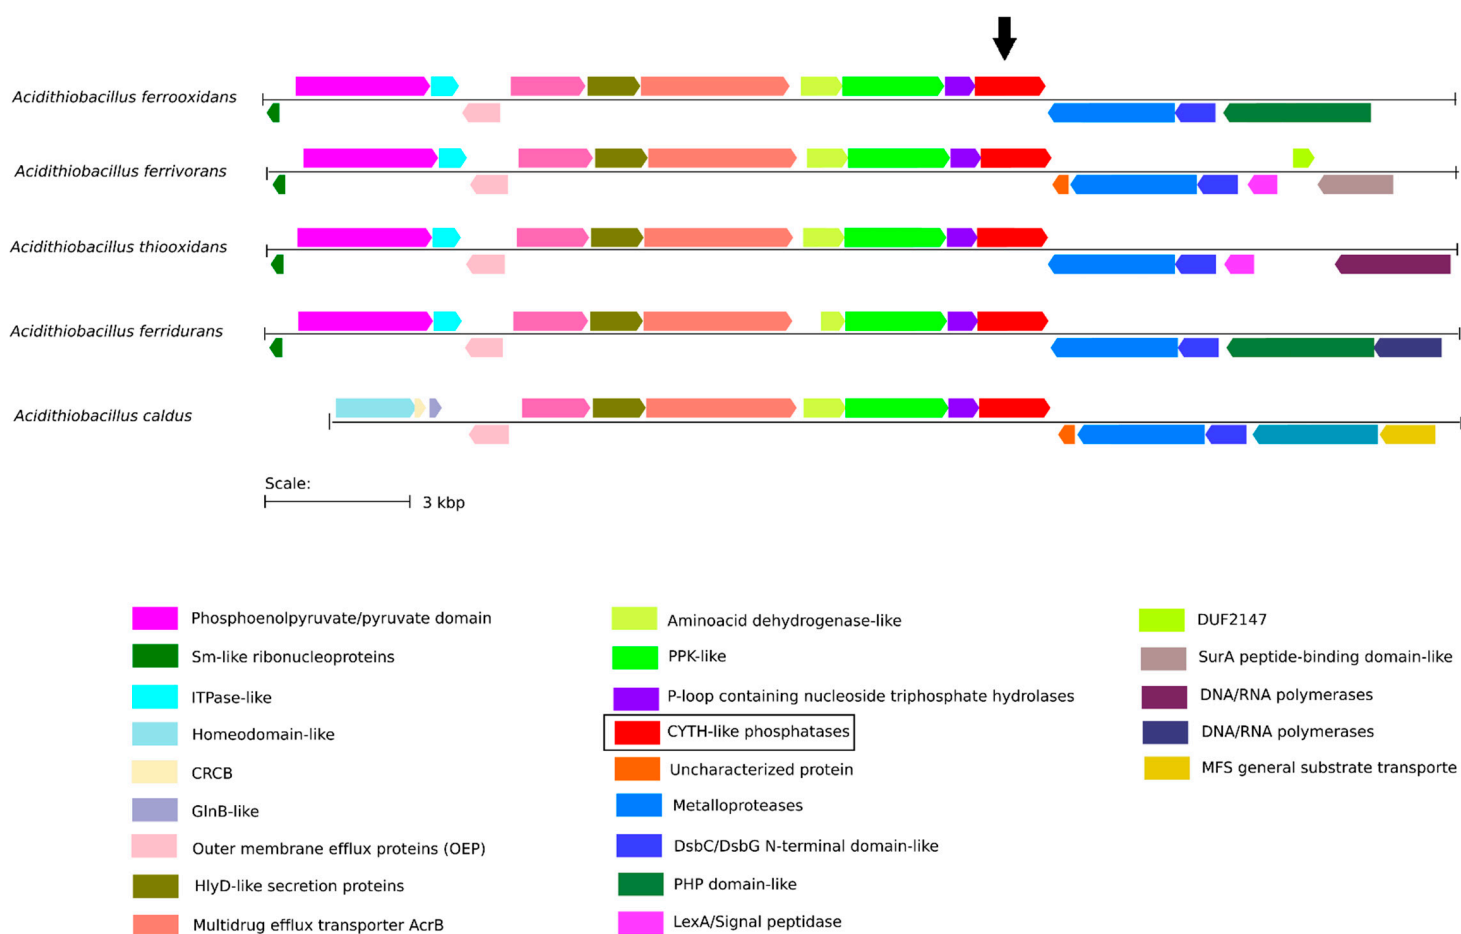

**Figure S3. Genome neighborhood of genes encoding CHAD proteins in bacteria belonging to the *Acidithiobacillus* genus.** The genomic neighborhood was generated by using the EFI-Genome Neighborhood Tool (EFI-GNT) which depicts the coding sequence region of CHAD proteins (in red, as indicated with the black arrow) along with putative functions of upstream and downstream genes. The CHAD protein used were: *A. ferrooxidans* (Uniprot: A0A2W1KGF8), *A. ferrivorans* (Uniprot: A0A7T4WBF3), *A. thiooxidans* (Uniprot: A0A1C2HWG7), *A. ferridurans* (Uniprot: A0A2Z6INW0) and *A. caldus* (Uniprot: A0A060A122). Genes with similar functions (either predicted or experimentally determined) are colored the same, based on PFAM superfamilies. Scale bar represents 3 kb. Genes are drawn to scale.

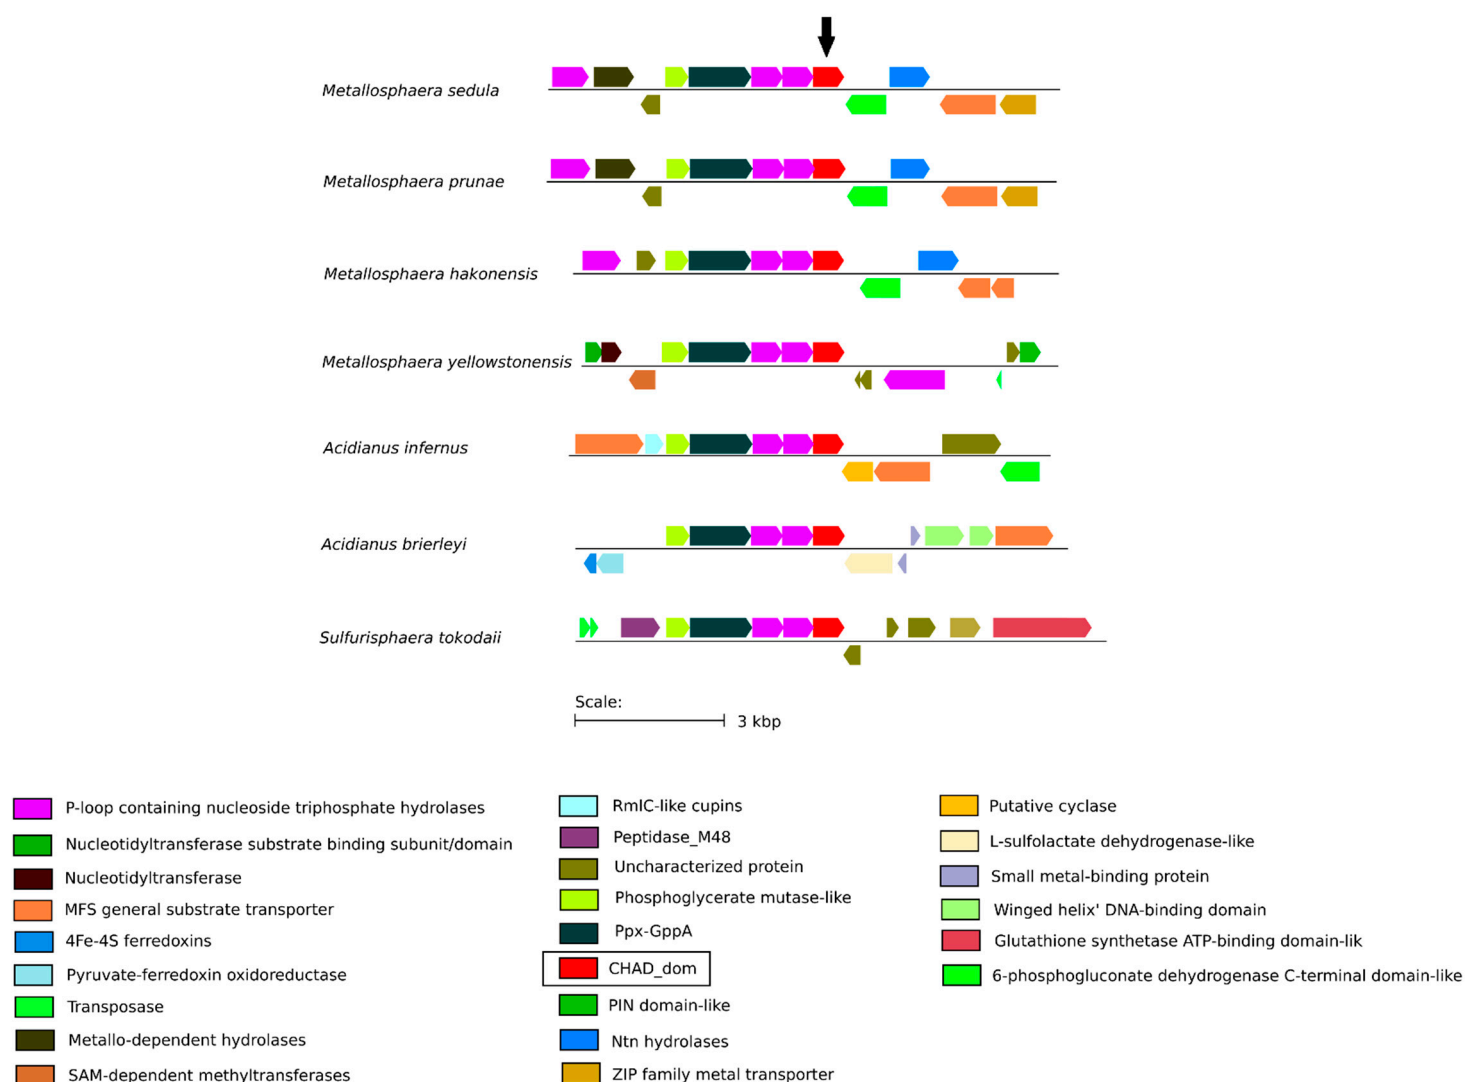

**Figure S4. Genome neighborhood of genes encoding CHAD proteins in biomining archaea.** The genomic neighborhood was generated by using the EFI-Genome Neighborhood Tool (EFI-GNT) which depicts the coding sequence region of CHAD proteins (in red, as indicated with the black arrow) along with putative functions of upstream and downstream genes. The CHAD protein used were: *M. sedula* (Uniprot: A0A088E592), *M. prunae* (Uniprot: A0A4D8S3A0), *M. hakonensis* (Uniprot: A0A2U9IWU4), *M. yellowstonensis* (Uniprot: H2C4Q5), *A. infernus* (Uniprot: A0A6A9QC85), *A. brierleyi* (Uniprot: A0A2U9ICA0) and *S. tokodaii* (Uniprot: A0A832WQX7). Genes with similar functions (either predicted or experimentally determined) are colored the same, based on PFAM superfamilies. Scale bar represents 3 kb. Genes are drawn to scale.



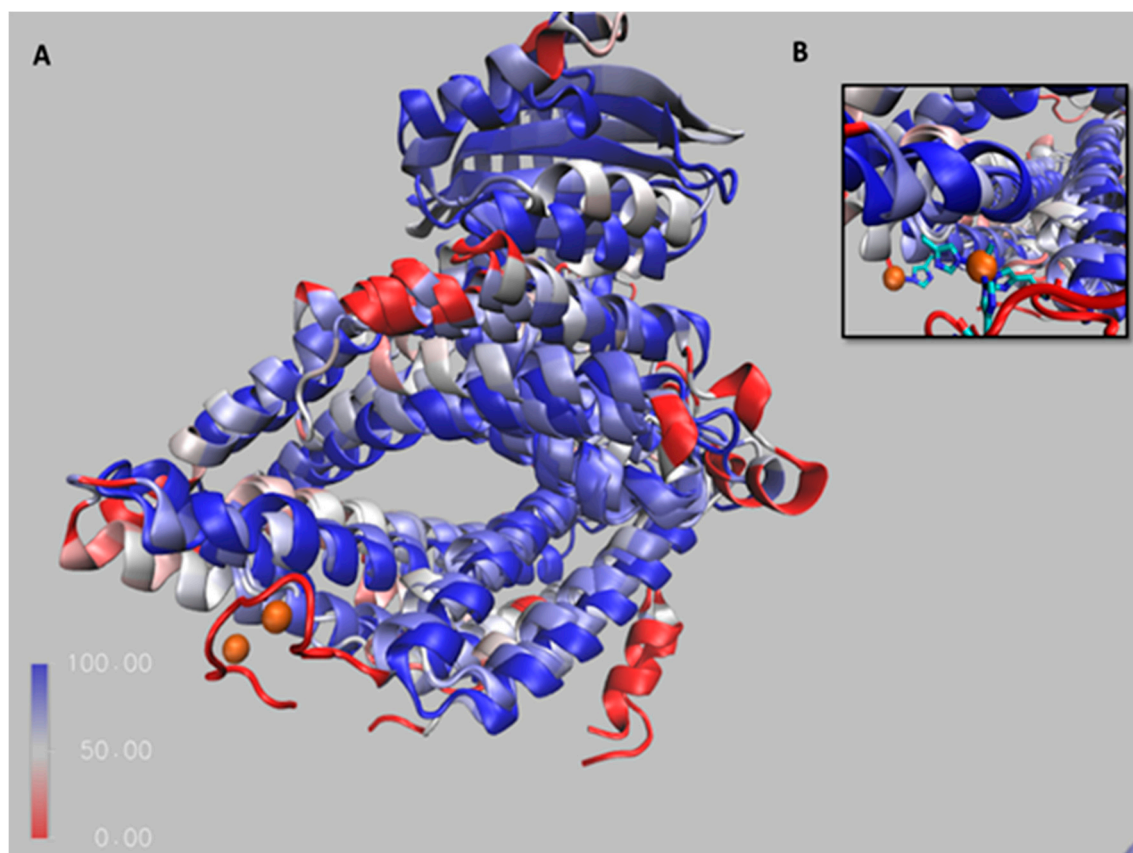

**Figure S5. Multiseq analysis of CHAD proteins from *S. chartreusis* (PDB: 6RN5), *E. coli* (PDB: 5A60), *A. ferrooxidans* (UniProt ID: A0A2W1KGF8), *M. sedula* (UniProt ID: A4YFE5), *Sa. solfataricus* (UniProt ID: Q97YW1). A.** General view of multiseq analysis. **B.** Zoom on the Cu binding sites of *S. chartreusis* CHAD protein. The structure alignment was coloring by root-mean-square distance (RMSD). The blue areas indicate structural conservation, whereas red areas indicate no correspondence in structural proximities.



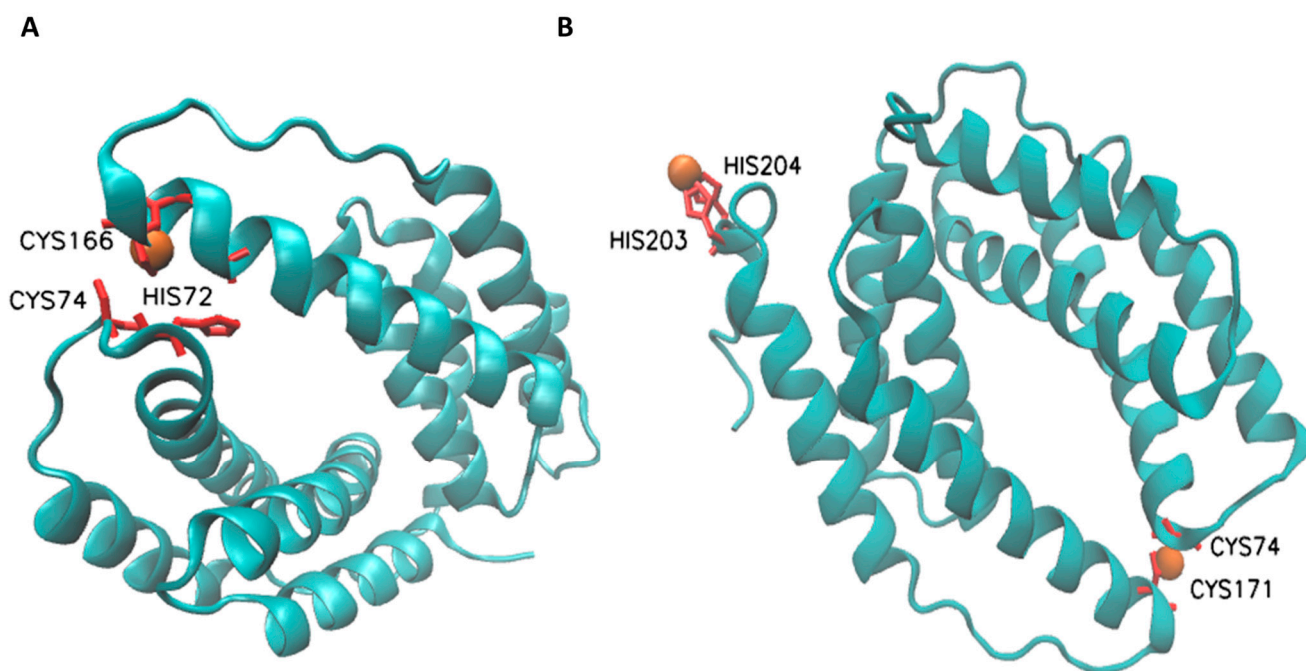

**Figure S6. Molecular docking for *M. sedula* and *Sa. solfataricus* CHAD proteins and  $\text{Cu}^{+1}$  obtained by using MIB server. A.** Predicted cuprous binding site is formed by His 72, Cys 74, 166 for *M. sedula*. **B.** Two copper binding sites are shown for *Sa. solfataricus* formed by His 203, 204, and Cys 74, 171.  $\text{Cu}^{+1}$  ion is depicted in orange.

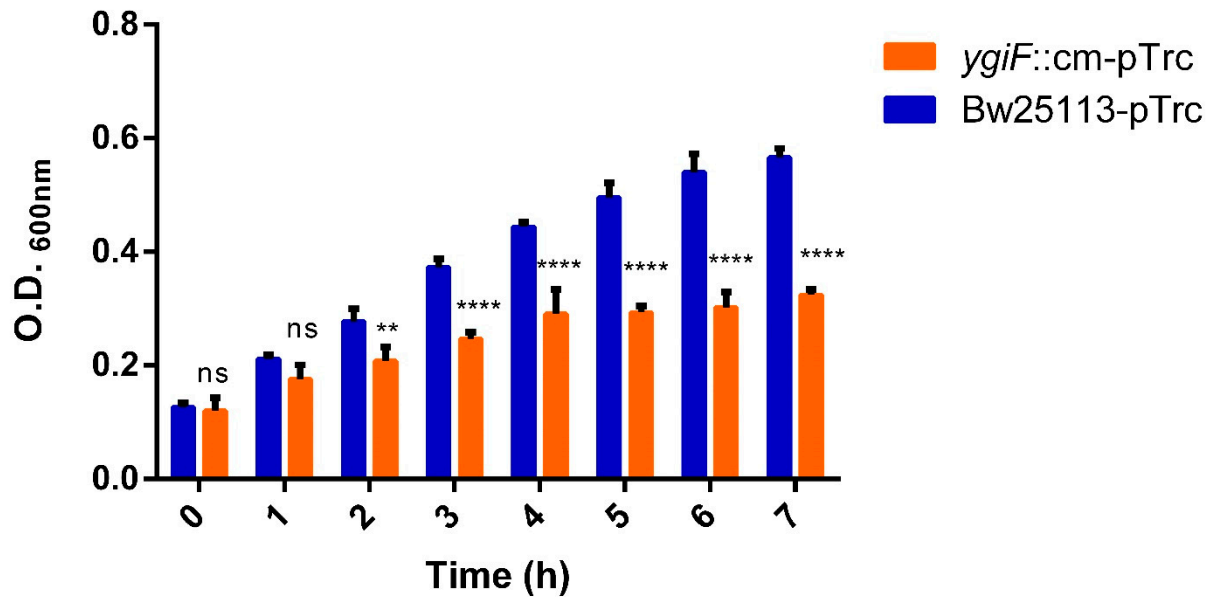

**Figure S7. Statistical analysis of copper resistance in the wildtype and *ygiF::cm* *E. coli* strains.** Two-way ANOVA test was used, where \*\*\*\* indicates  $p \leq 0.0001$ , \*\*\*  $p \leq 0.001$ , \*\*  $p \leq 0.01$ , \*  $p \leq 0.05$  and ns not significant.

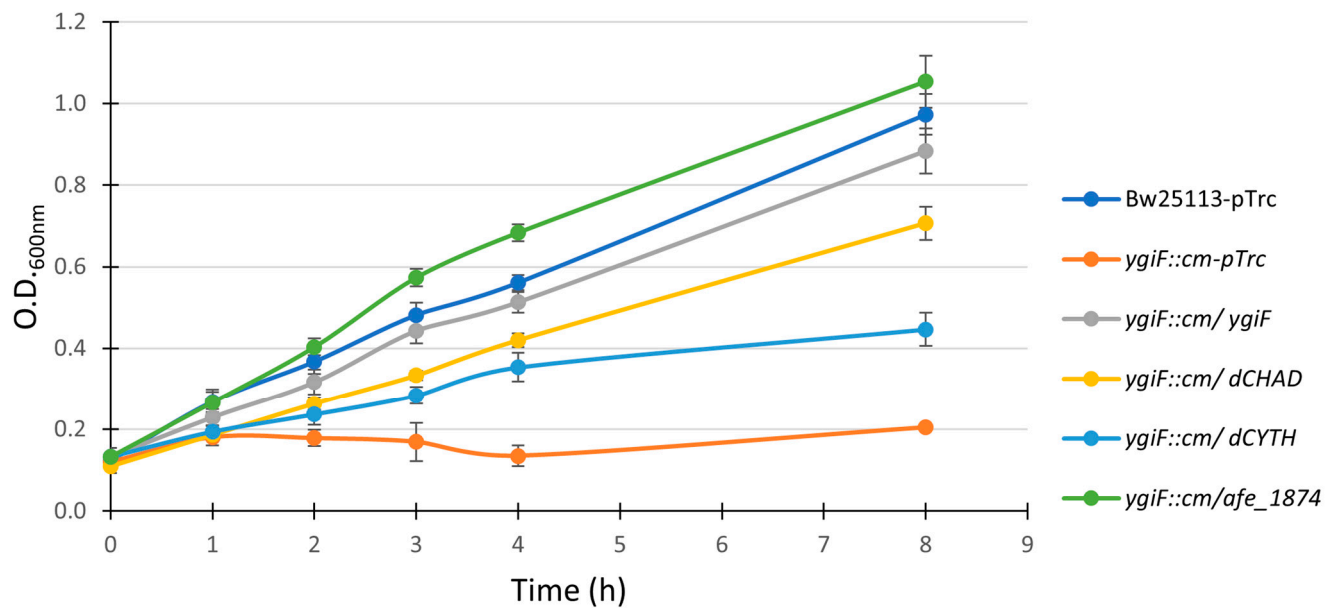

**Figure S8. Complemented strains restore wildtype phenotype.** Copper resistance of *E. coli* complemented strains. Cells were grown in LB medium supplemented with 1 mM IPTG in the absence of copper until they reached an O.D.<sub>600</sub> of 0.1. At this point, cells were then grown in LB medium supplemented with CuSO<sub>4</sub> to reach 3 mM final concentration. Finally, cultures were incubated at 37°C and optical density was measured in each indicated strain at the indicated times. Three biological replicates were obtained in each strain construction.

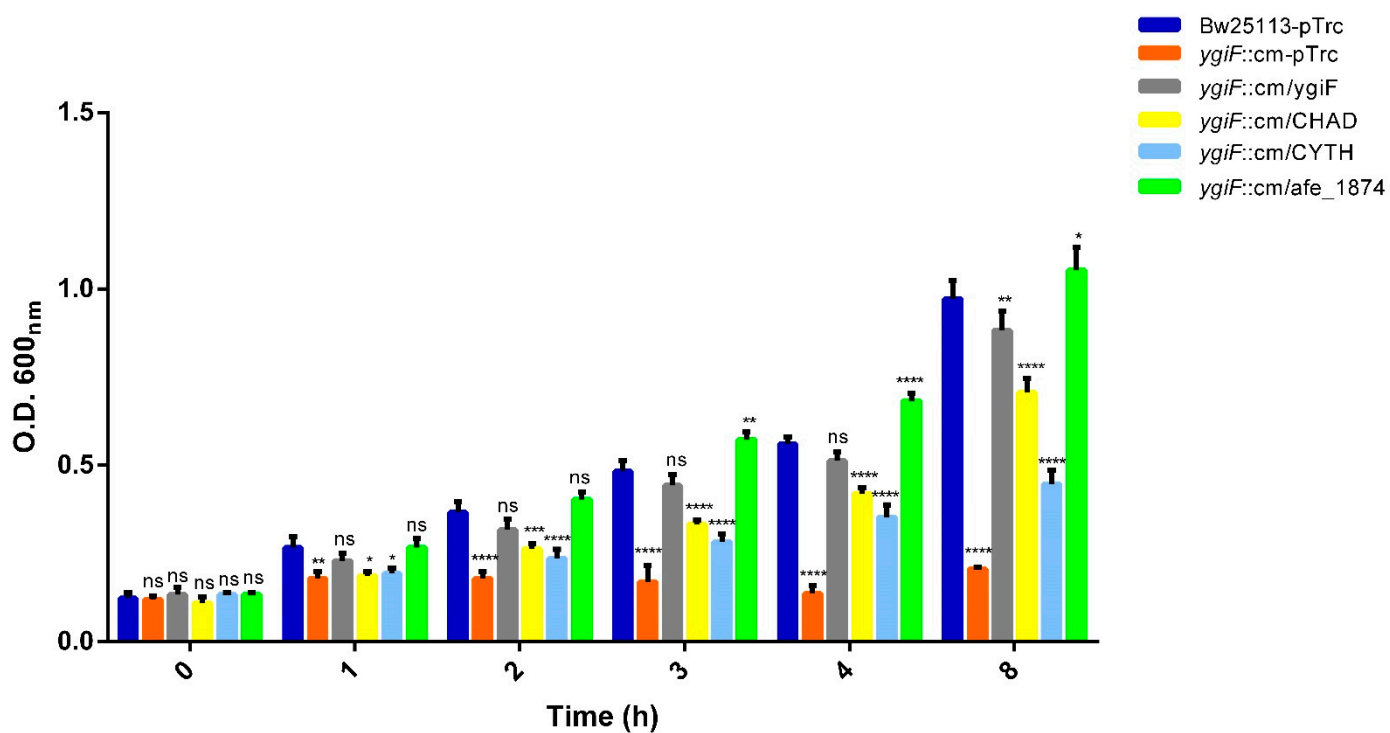

**Figure S9. Statistical analysis of copper resistance in different *E. coli* mutants.** Two-way ANOVA test was used, where \*\*\*\* indicates  $p \leq 0.0001$ , \*\*\*  $p \leq 0.001$ , \*\*  $p \leq 0.01$ , \*  $p \leq 0.05$  and ns not significant.

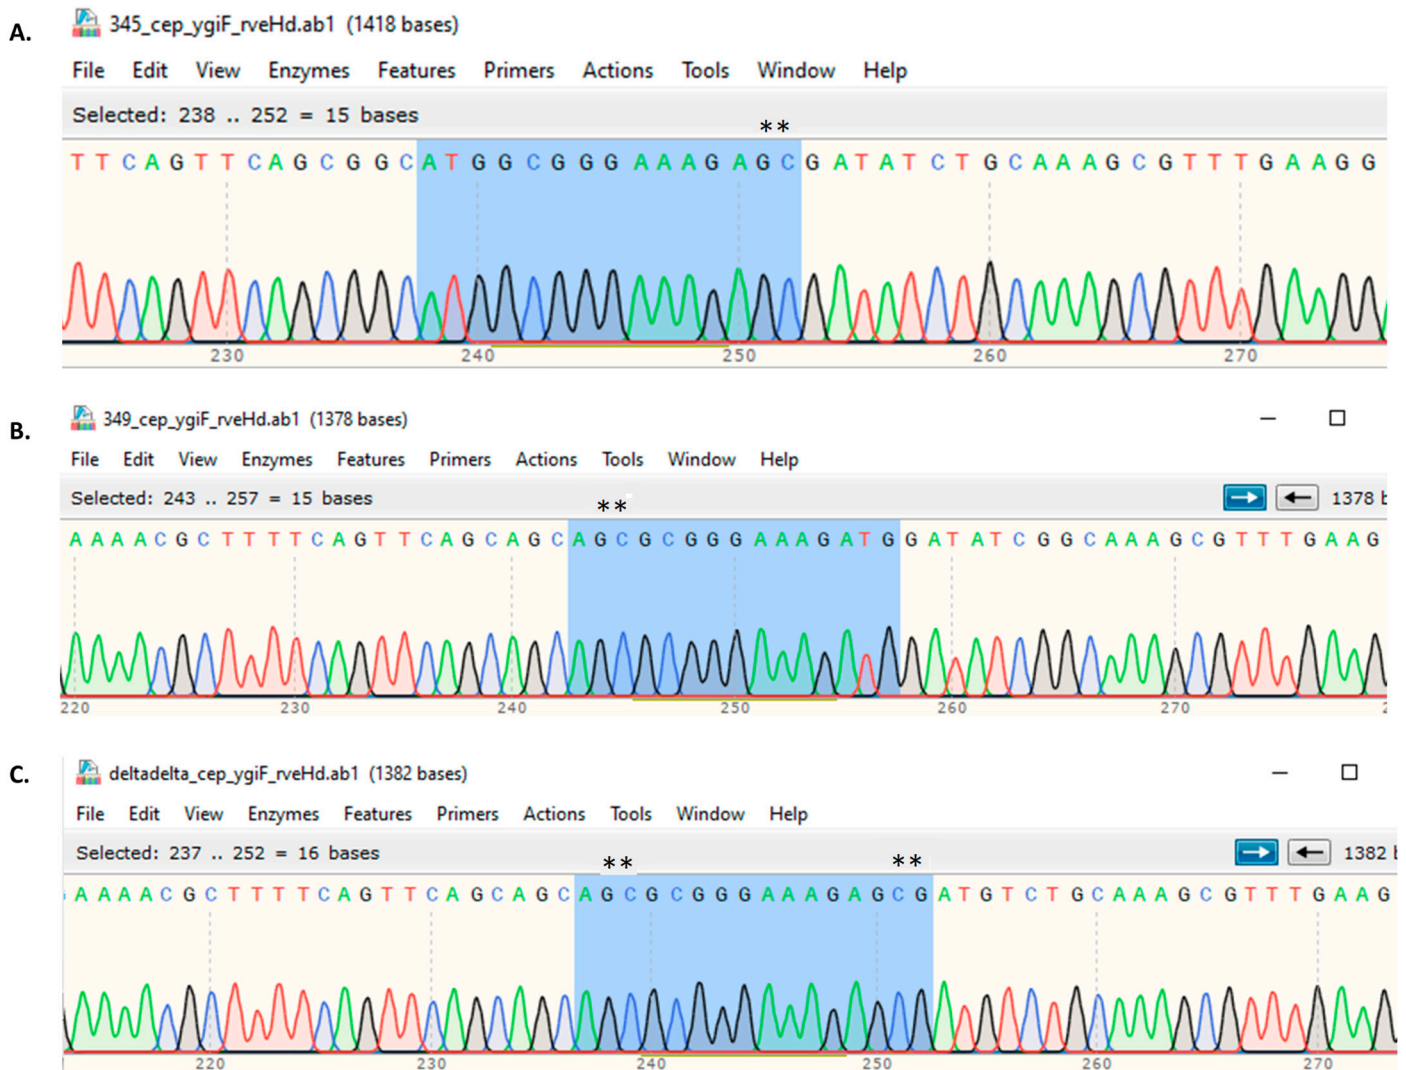

**Figure S10. Part of the nucleotide sequences of mutated *ygiF* genes constructed in *E. coli*. A. *ygiF*\*H345A, B. *ygiF*\*H349A and C. *ygiF*\*H345,349A. The light blue rectangle indicates the amino acids “*HRLSH*” region of interest. The asterisks indicate the mutated nucleotides. Note the “ATG ” sequence codifies for a histidine that was replaced by “AGC” coding for an alanine in His345 (A), His349 (B) and both histidines in C.**

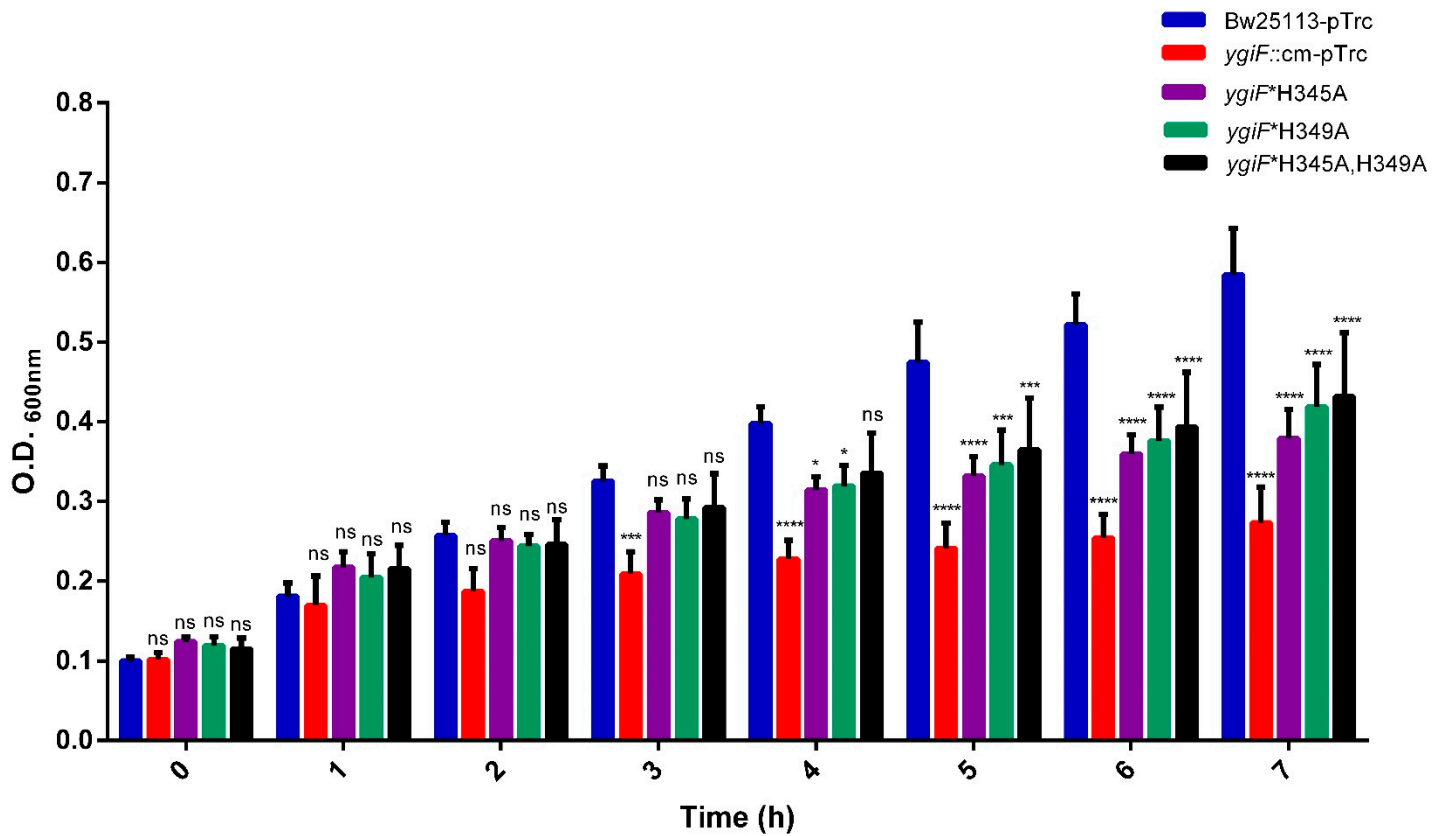

**Figure S11. Statistical analysis of copper resistance in YgiF variant *E. coli* strains.** Two-way ANOVA test was used, where \*\*\*\* indicates  $p \leq 0.0001$ , \*\*\*  $p \leq 0.001$ , \*\*  $p \leq 0.01$ , \*  $p \leq 0.05$  and ns not significant.
