# Supplementary material for: Possible Role of CHAD Proteins in Copper Resistance
Source: Microorganisms. 2024 Feb 18;12(2):409. doi: 10.3390/microorganisms12020409 (PMC10892726; doi:10.3390/microorganisms12020409)
Supplement: Supplementary file 1 [file microorganisms-12-00409-s001.zip]

Archive with 12 entries (12 files):
- Fig S1.tiff
- Fig S10.tiff
- Fig S11.tiff
- Fig S2.tiff
- Fig S3.tiff
- Fig S4.tiff
- Fig S5.tiff
- Fig S6.tiff
- Fig S7.tiff
- Fig S8.tiff
- Fig S9.tiff
- Supplementary Material.pdf
